# Supplementary material
Source: publisher site journal article supplement (https://www.dovepress.com/article/474299)
Supplement: Supplementary file 1 [file get_supplementary_file.php]

***Supporting information***

**Comparative study and transcriptomic analysis on the antifungal mechanism of Ag nanoparticles and nanowires against *Trichosporon asahii***

Minna Han,*a,b,1* Zhikuan Xia,*b,1* Yuekun Zou,*c* Ping Hu,*d* Mingwang Zhang,*e* Xin Yang,*c* Ming-Guo Ma,*f*,*[[1]](#footnote-1)** Rongya Yang*b,**

*a*Chinese PLA Medical School, Beijing 100072, PR China;

*b*Department of Dermatology, The Seventh Medical Center of PLA General Hospital, Beijing 100072, PR China;

*c*Department of Geriatrics, The Sixth Medical Center of PLA General Hospital, Beijing 100072, PR China;

*d*Southern Medical Branch of PLA General Hospital, Beijing 100072, PR China;

*e*Department of Dermatology, Southwest Hospital, Army Medical University, Chongqing, China;

*f*College of Materials Science and Technology, Beijing Forestry University, Beijing 100083, PR China.

1Authors have contributed equally to this work.


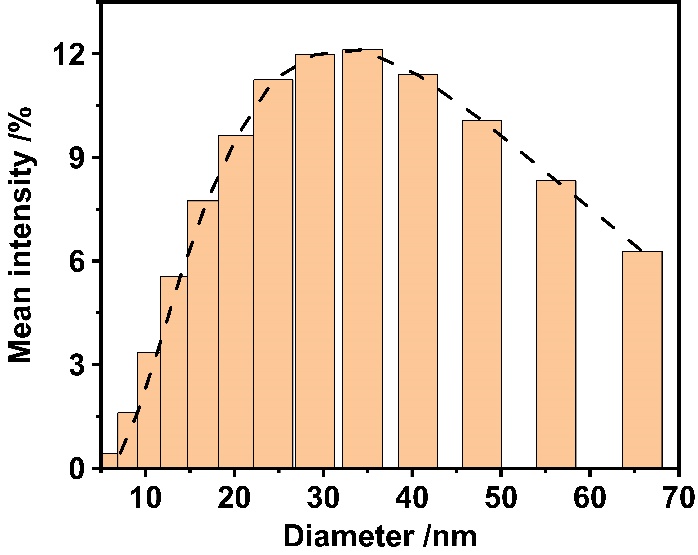


**Figure S1.** Size distribution of silver nanoparticles.


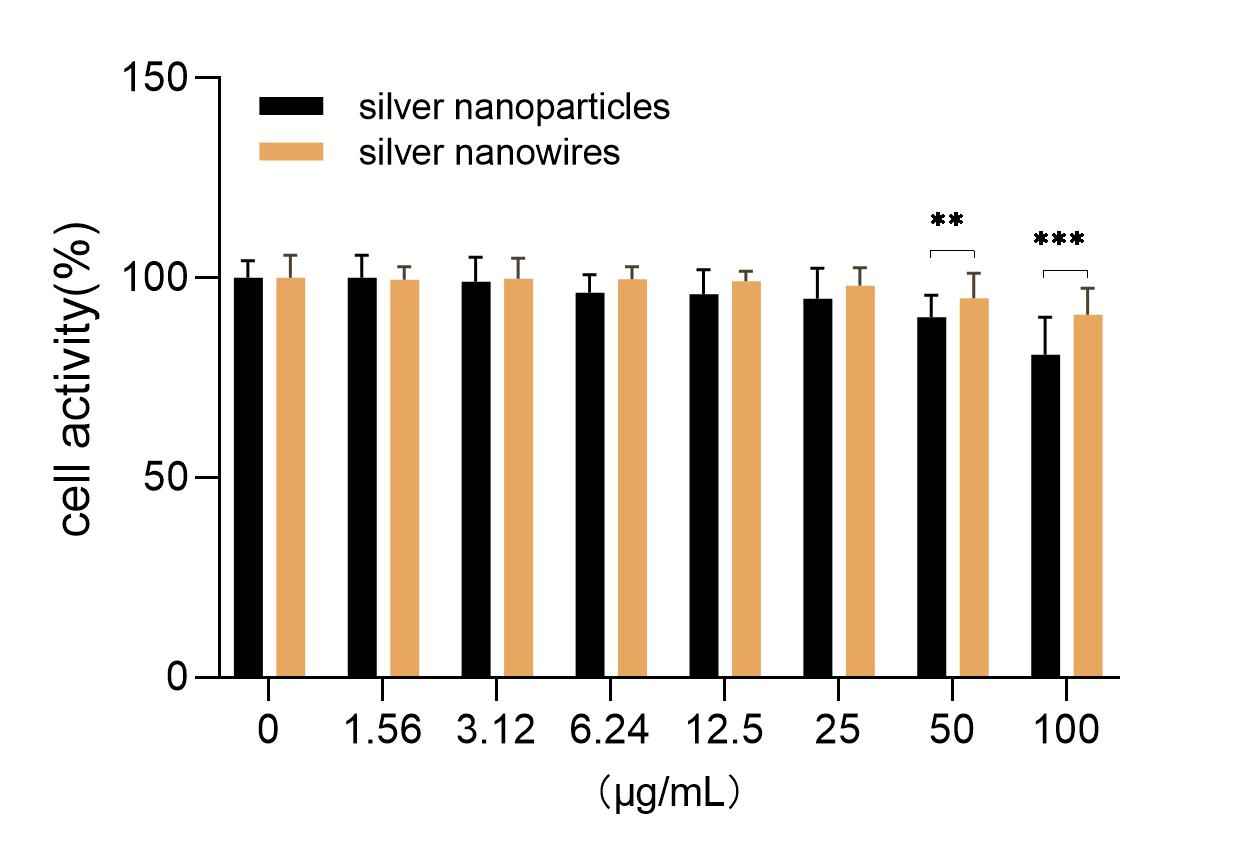


**Figure S2.** Viabilities of non-malignant fibroblast cells incubated with the silver nanomaterials. ** indicate P < 0.01, *** indicate P < 0.001.


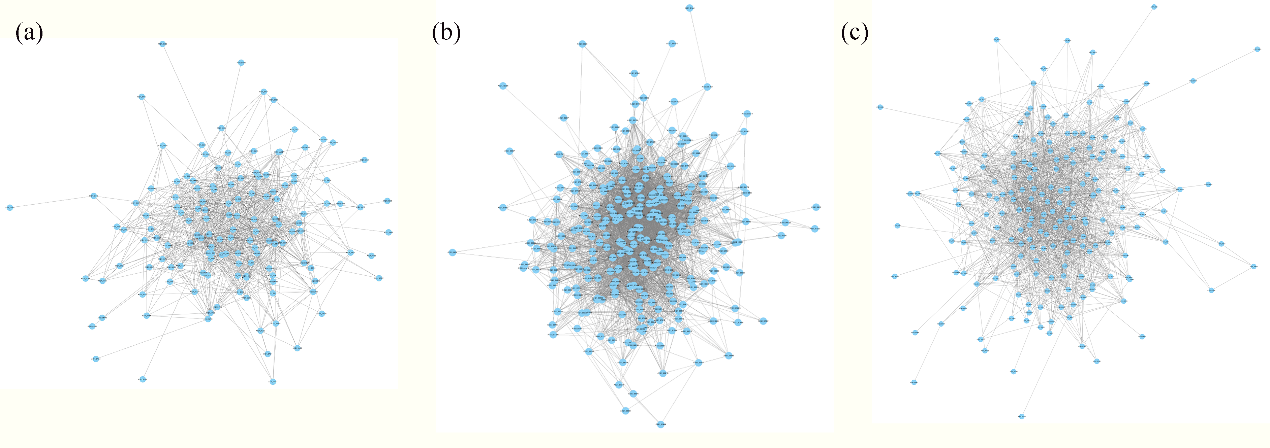


**Figure S3.** (a) PPI network of DEGs in treat 1vs control; (b) PPI network of DEGs in treat 2 vs control; (c) PPI network of DEGs in treat 2 vs treat 1.

|  | **N** | **Mean** | **Std. Deviation** | **Std. Error**  **Mean** |
| --- | --- | --- | --- | --- |
|
| Nanowires | 6 | 2.6000 | 0.80558 | 0.32888 |
| Nanoparticles | 6 | 0.3267 | 0.09812 | 0.04006 |

**Table S1.** Descriptives of MIC.

|  | **Sum of** **Squares** | **df** | **Mean Square** | **F** | **Sig.** |
| --- | --- | --- | --- | --- | --- |
| Between Groups | 7713.812 | 2 | 3856.906 | 13.825 | <0.001 |
| Within Groups | 4184.626 | 15 | 278.975 |  |  |
| Total | 11898.438 | 17 |  |  |  |

**Table S2. ANOVA of MIC**

| (I)Group | (J)Group | Mean Difference(I-J) | Std.Error | Sig. | 95% Confidence interval of the Difference | |
| --- | --- | --- | --- | --- | --- | --- |
| Lower bound | Upper bound |
| Nanowires | Nanoparticles | 2.27333* | **0.33131** | 0.002 | 1.1594 | 3.3873 |
|  | FLC | -42.73333* | 11.81042 | 0.04 | -82.8561 | -2.6106 |
| Nanoparticles | Nanowires | -2.27333* | 0.33131 | 0.002 | -3.3873 | -1.1594 |
|  | FLC | -45.00667* | 11.8059 | 0.033 | -85.1374 | -4.8759 |
| FLC | Nanowires | 42.73333* | 11.81042 | 0.04 | 2.6106 | 82.8561 |
|  | Nanoparticles | 45.00667* | 11.8059 | 0.033 | 4.8759 | 85.1374 |

**Table S3. Multiple of Comparisons (Dunnett T3)**

* The mean difference is significant at the 0.05 level.

**Table S4.** T-testIndependent Samples Test of MFC.

|  | Levene's test for equality of variances | |  |  | t-test for Equality of Means | | | 95% Confidence interval of the Difference | |
| --- | --- | --- | --- | --- | --- | --- | --- | --- | --- |
|  | **F** | **Sig.** | **t** | **df** | **Sig.(2-tailed)** | **Mean Difference** | **Std. Error Difference** | **Lower** | **Upper** |
| Equal variances assumed | 35.027 | <0.001 | -7.398 | 10 | <0.001 | -78.13333 | 10.56143 | -101.66566 | -54.60101 |
| Equal variances notassumed |  |  | -7.398 | 5.039 | <0.001 | -78.13333 | 10.56143 | 105.21937 | -51.04730 |

| **No.** | **Gene** | **Composition** | **Function** |
| --- | --- | --- | --- |
| 1 | A1Q1_01566 | Membrane structure (Multi-pass membrane protein) | Transmembrane transporter activity |
| 2 | A1Q1_00884 | Nucleus | Transmembrane transporter activity |
| 3 | A1Q1_02693 | Ribonucleoprotein complex, ribosome | rRNA binding,structural constituent of ribosome,translation |
| 4 | A1Q1_02927 |  |  |
| 5 | A1Q1_03625 |  |  |
| 6 | A1Q1_03974 |  |  |
| 7 | A1Q1_04006 |  |  |
| 8 | A1Q1_04455 | RRM domain-containing protein | RNA binding |
| 9 | A1Q1_04505 | Cellular anatomical entity | ATP binding, glutamate-tRNA ligase activity, tRNA binding, zinc ion binding, glytamyl-RNA aminoacylation |
| 10 | A1Q1_04538 |  |  |
| 11 | A1Q1_05137 | Membrane structure (Multi-pass membrane protein) | Oxidoreductase activity, Pyruvate metabolism |
| 12 | A1Q1_06703 | Plasma membrane | Potassium ion transmembrane transporter activity |
| 13 | A1Q1_07887 |  |  |
| 14 | A1Q1_08175 | Membrane | Oxidoreductase activity, sphingolipid metabolic process |
| 15 | A1Q1_02992 | Membrane | Potassium ion transmembrane transporter activity |

**Table S5.** Primers for RT-qPCR.

1. *Corresponding author. Tel.: +0086-10-62337250. E-mail address: mg_ma@bjfu.edu.cn (M.-G. Ma), sum7@sina.com (Z.-K. Xia), yangrya@sina.com (R.-Y. Yang). [↑](#footnote-ref-1)
